# Supplementary material
Source: publisher figshare collection journal article supplement (https://frontiersin.figshare.com/ndownloader/files/31577738)

**Pterostilbene alleviates cholestatic liver injury in a cholestasis mouse model by promoting SIRT1 activity in hepatocytes and macrophages**

Chuanrui Ma<sup>1,5,#</sup>, Guangyan Yang<sup>2,#</sup>, Jiaqing Xiang<sup>2,#</sup>, Xinyu Wang<sup>2</sup>, Han Wu<sup>2</sup>, Zhen Liang<sup>2</sup>, Lin Kang<sup>2,4</sup>, Shu Yang<sup>2,3,\*</sup>

**Supplementary figures (the whole uncropped images of the original western blots)**

Figure 3E SIRT1

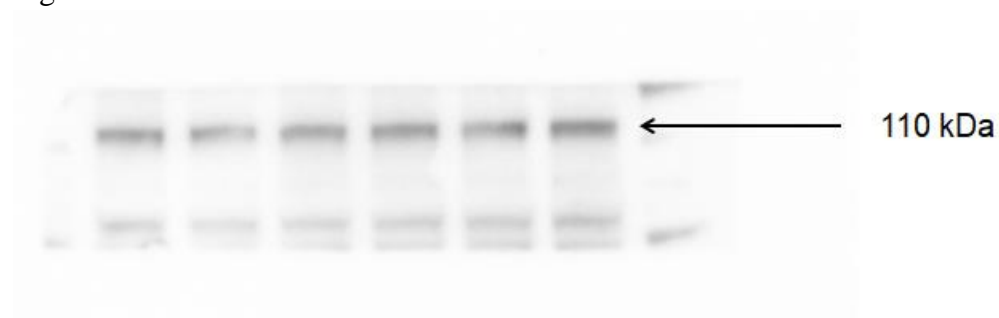

Figure 3E p19Arf

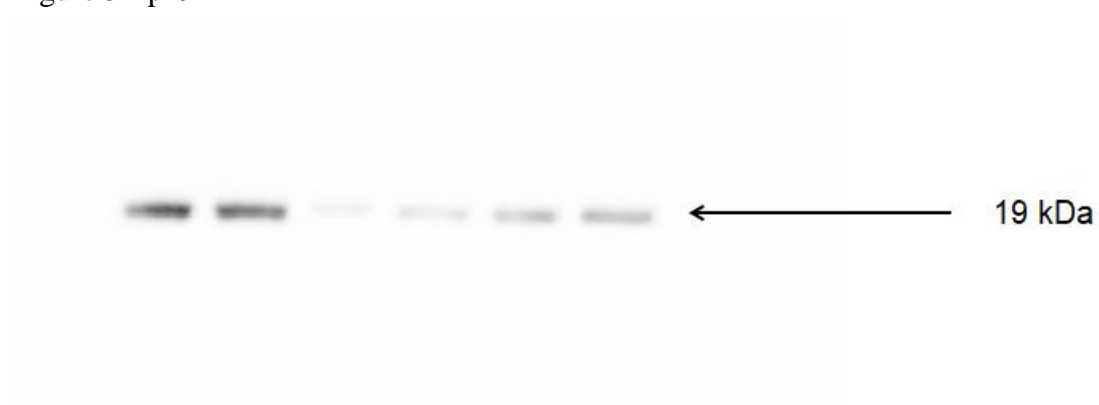

Figure 3E p53

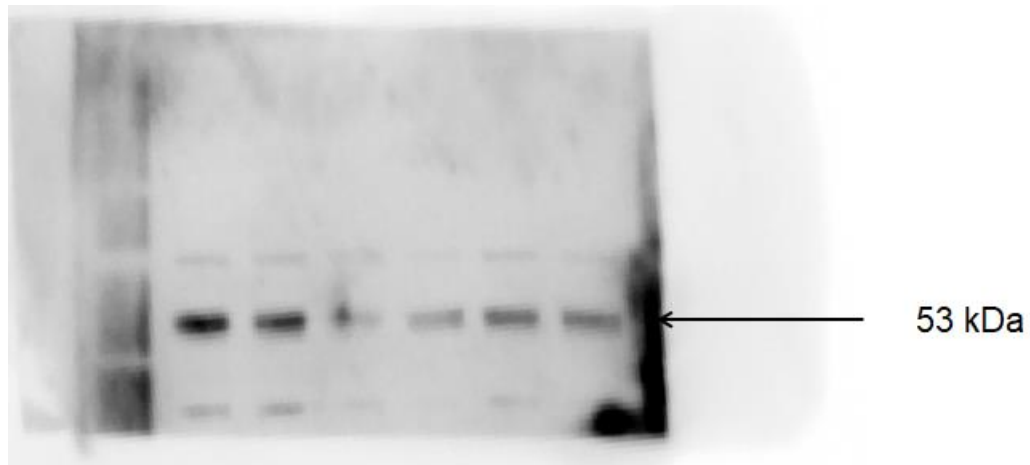

Figure 3E Ub-p53

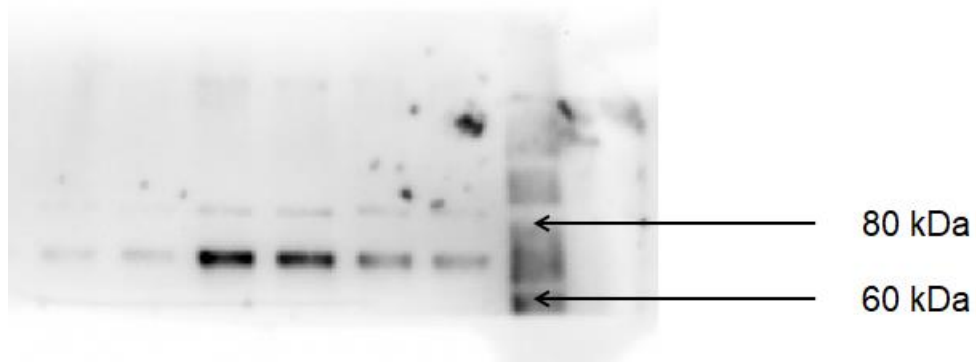

Figure 3E ACTB

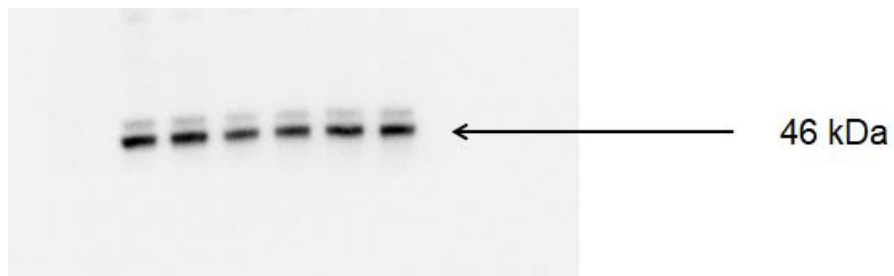

Figure 4A Ac-FXR

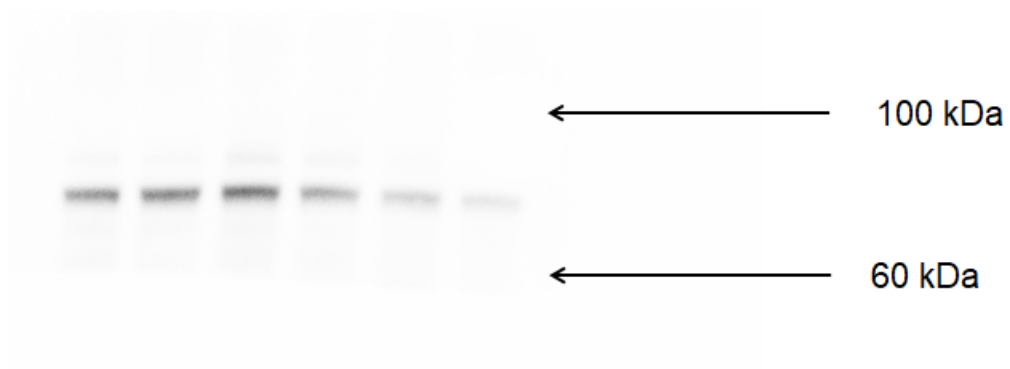

Figure 4A Input-FXR

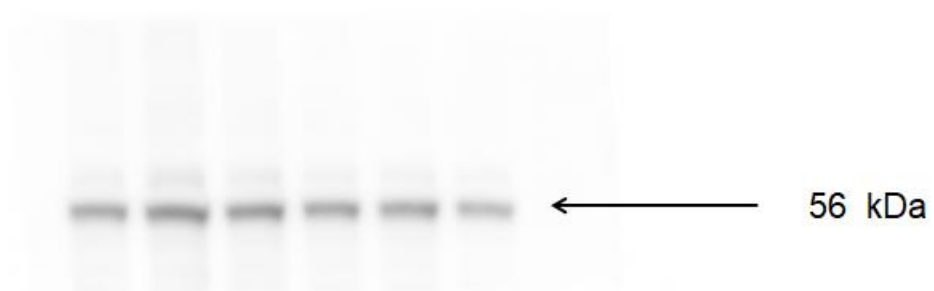

Figure 4B FXR

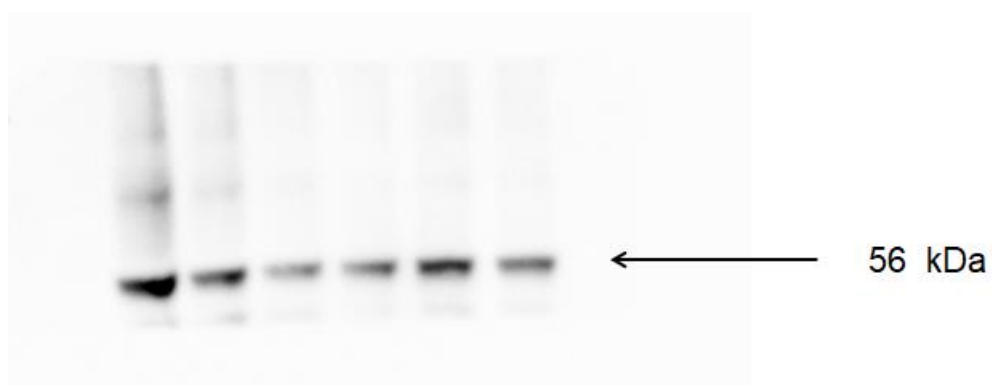

Figure 4B ACTB

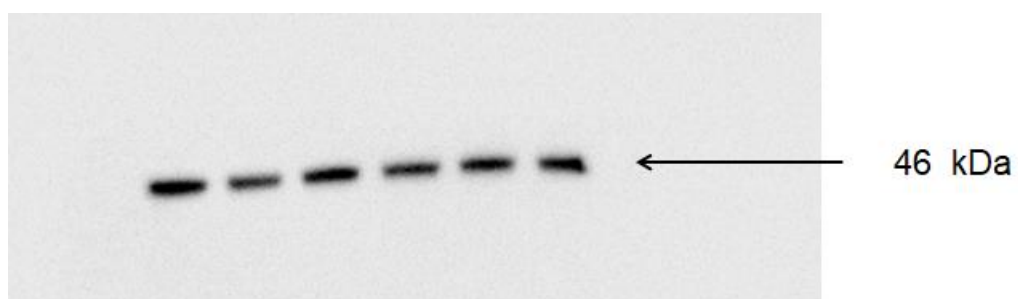

Figure 4F Ac-FXR

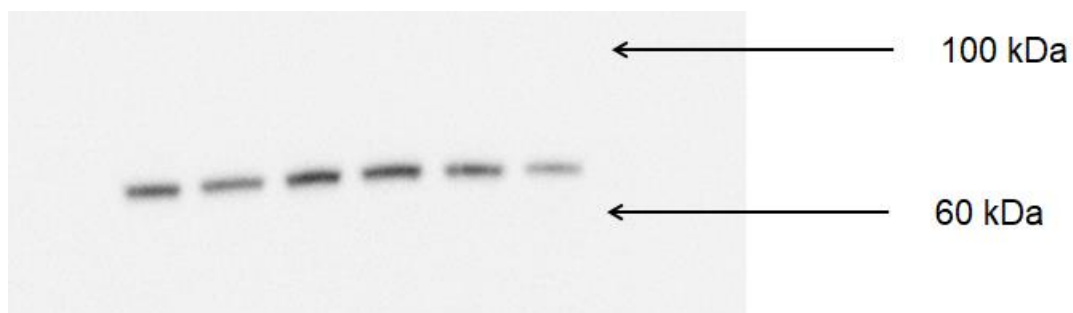

Figure 4F Input-FXR

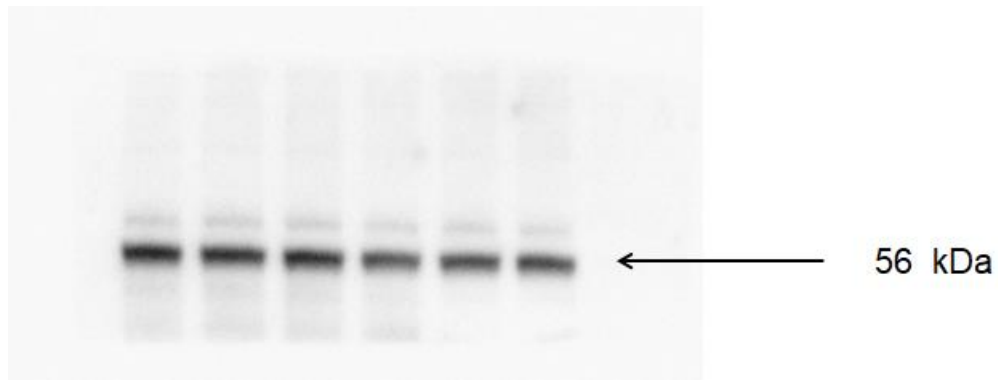

Figure 4G FXR

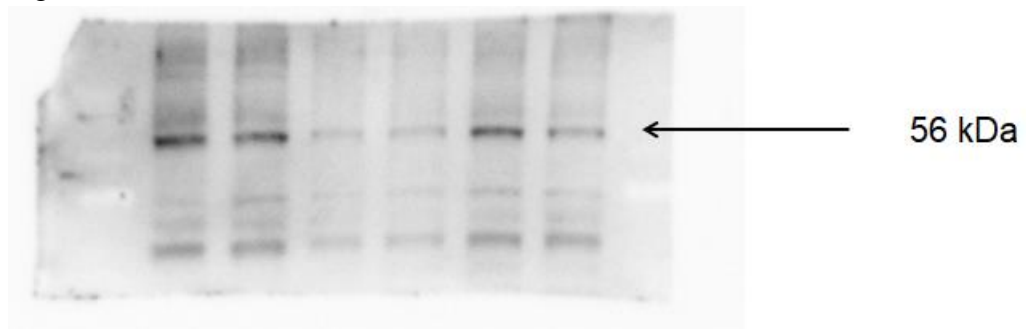

Figure 4G ACTB

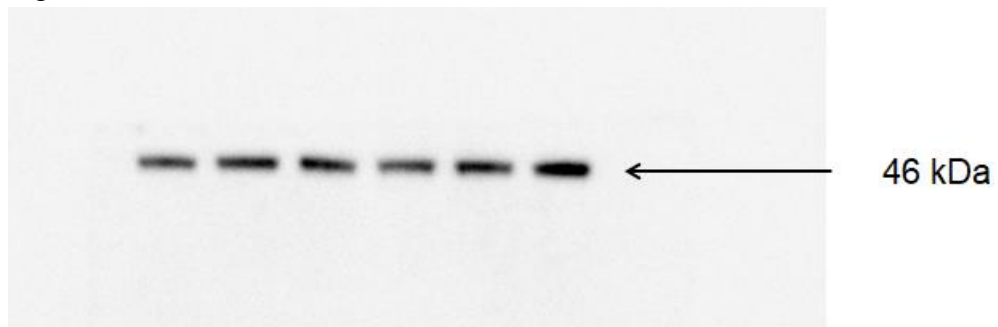

Figure 5C Ac-FXR

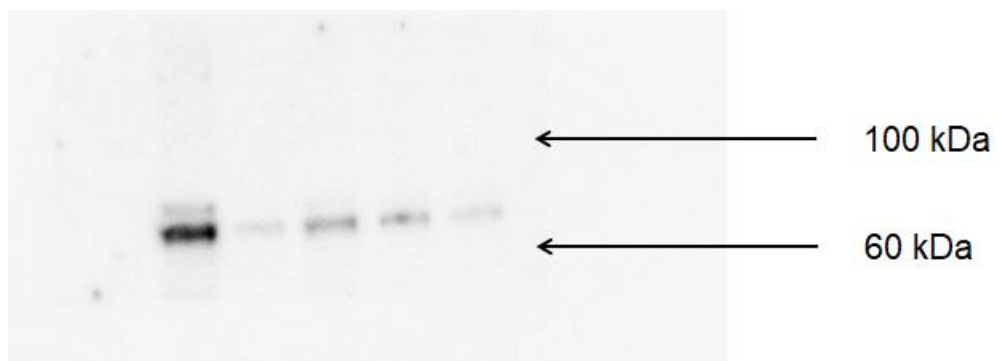

Figure 5C ACTB

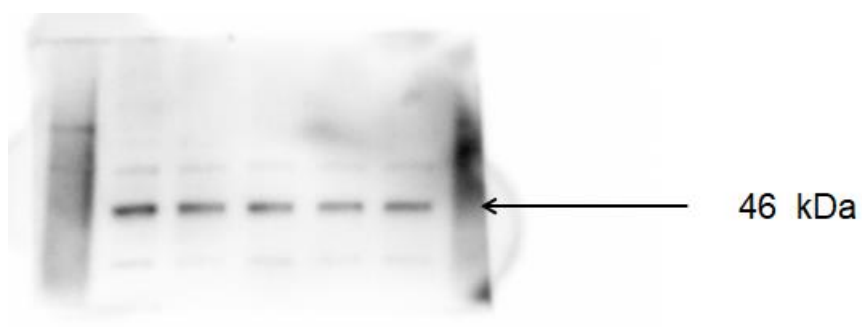

Figure 5D ACTB

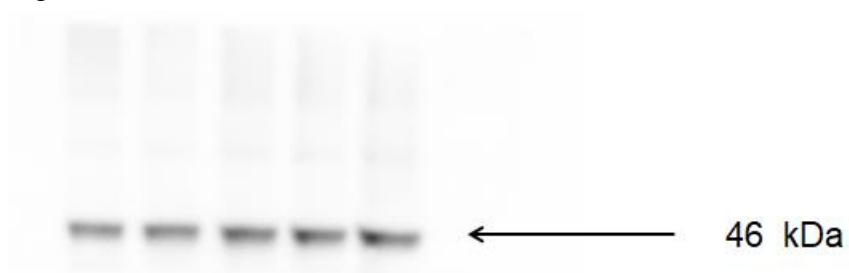

Figure 5D FXR

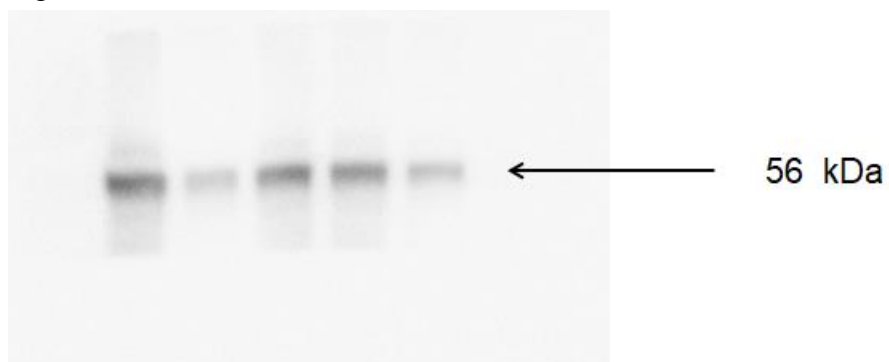

Figure 5E Input-FXR

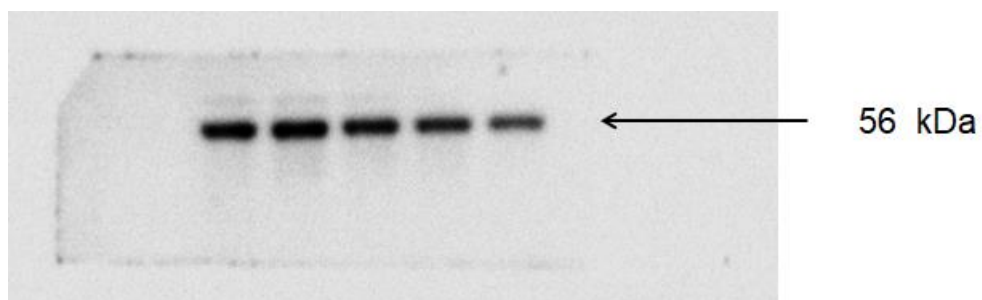

Figure 5E Ac-FXR

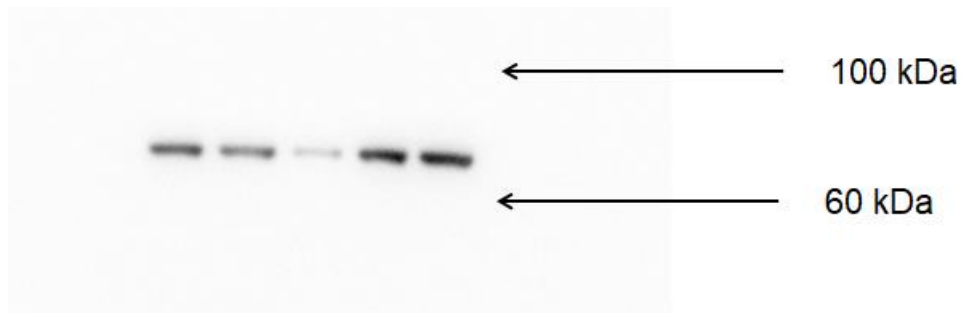

Figure 5F FXR

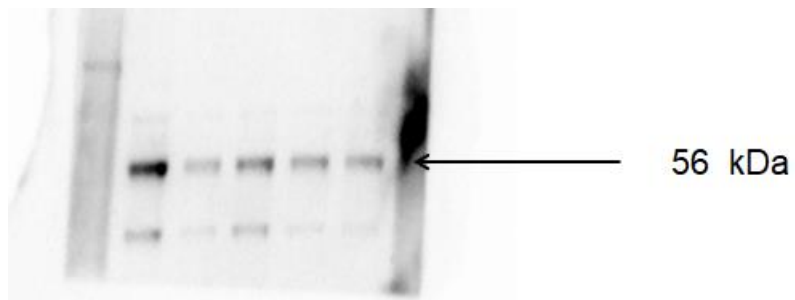

Figure 5F SIRT1

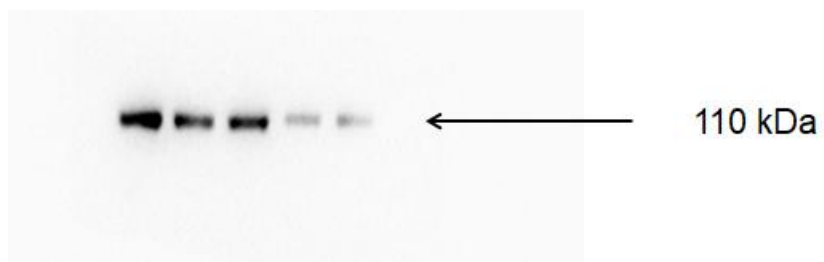

Figure 5F ACTB

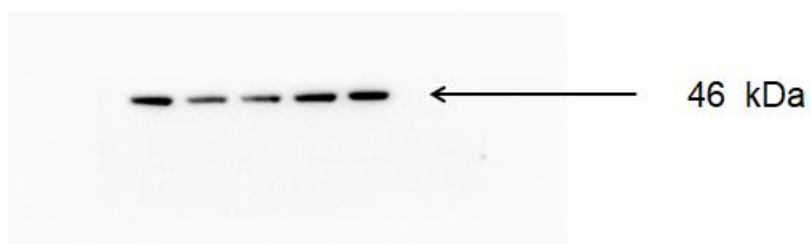

Figure 6A Ub-p53

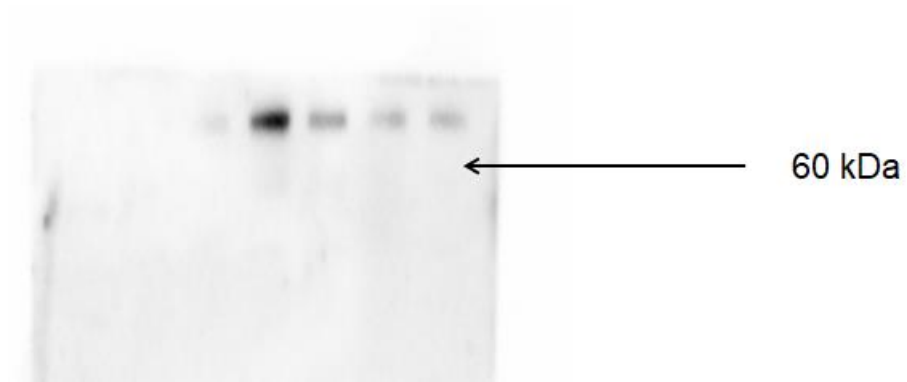

Figure 6A nonUb-p53

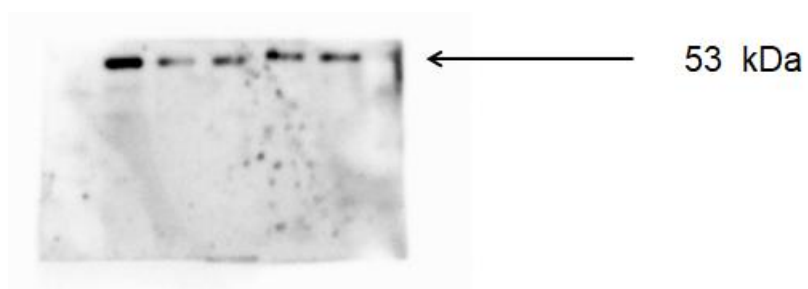

Figure 6B SIRT1

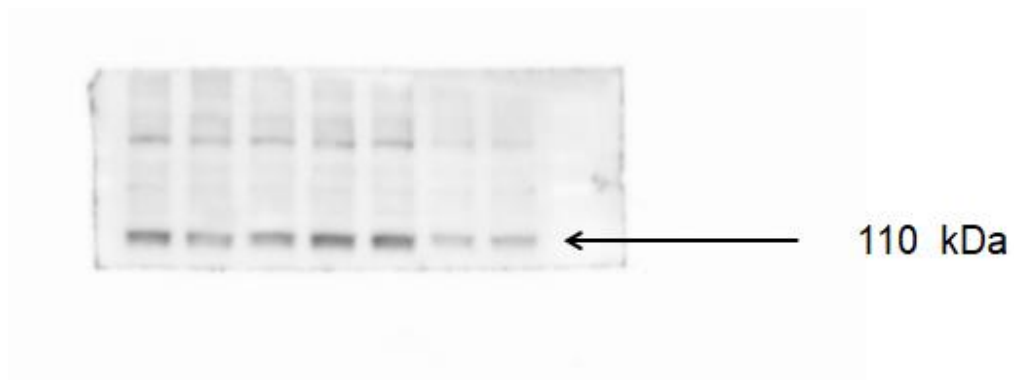

Figure 6B p53

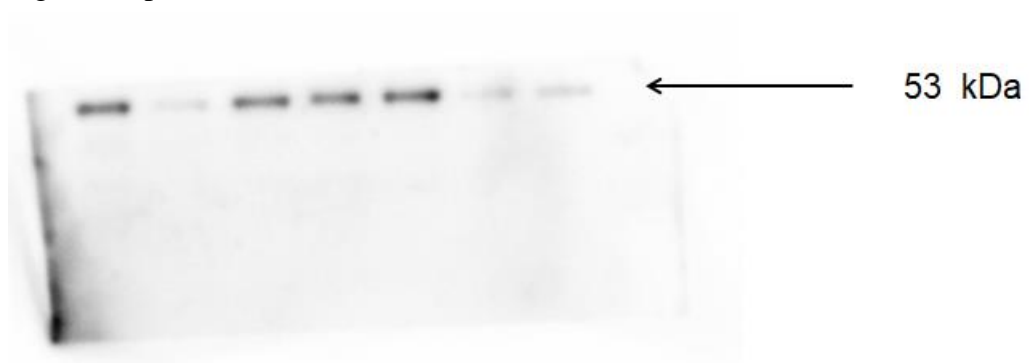

Figure 6B PUMA

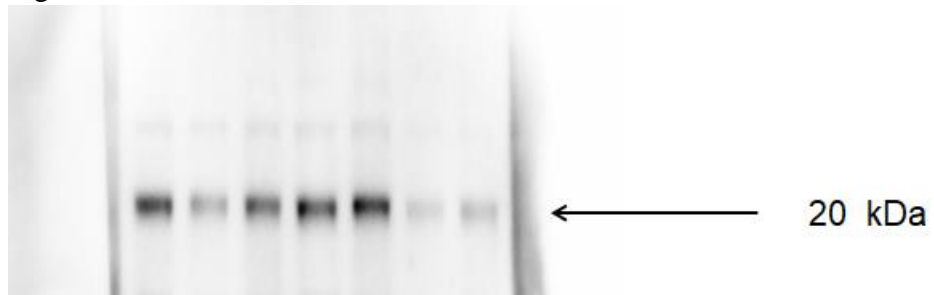

Figure 6B p-IKBA

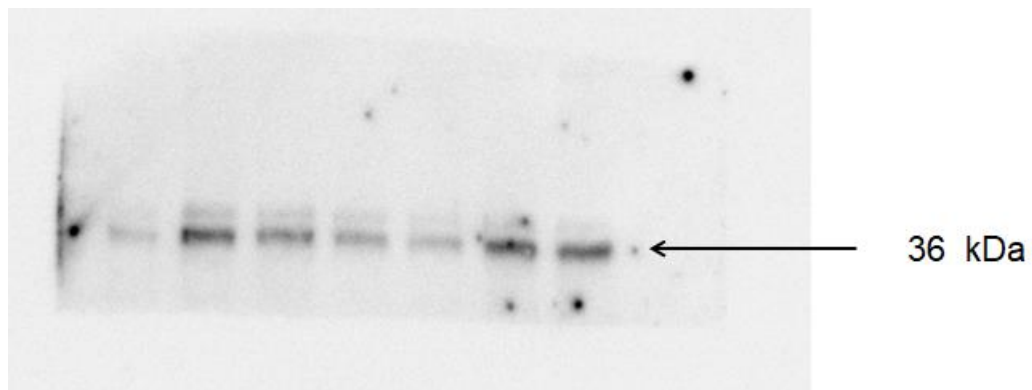

Figure 6B IKBA

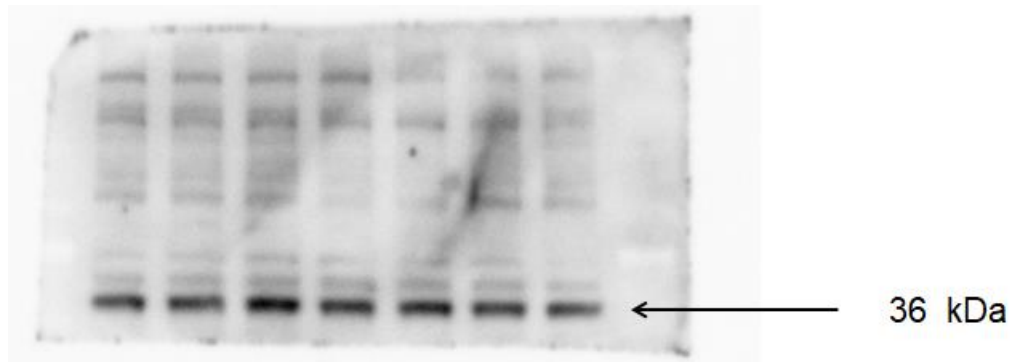

Figure 6B p19Arf

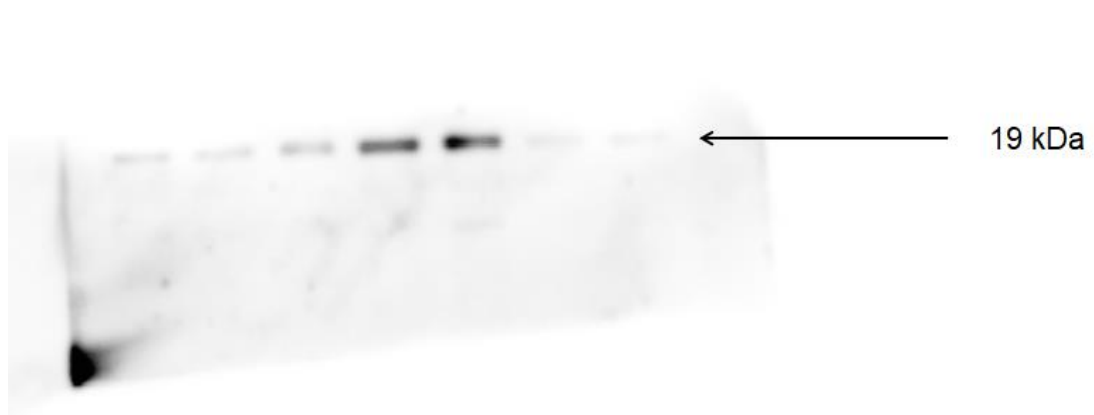



Figure 6B ACTB

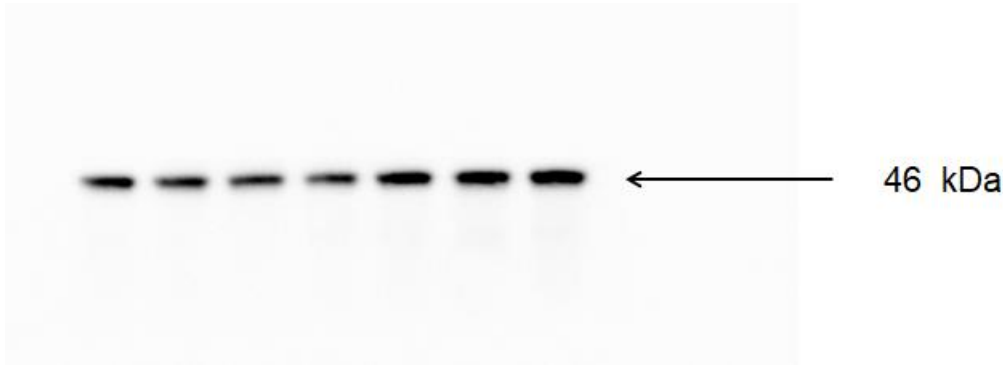

Supplement: Supplementary file [file 31577738]
